# Supplementary material
Source: ML conference proceedings conference paper supplement (https://openaccess.thecvf.com/content/CVPR_2020/html/Xu_EventCap_Monocular_3D_CVPR_2020_paper.html)
Supplement: Supplementary file 1 [file Xu_EventCap_Monocular_3D_CVPR_2020_supplemental.pdf]

# EventCap: Monocular 3D Capture of High-Speed Human Motions using an Event Camera (Supplementary)

Lan Xu<sup>1,3</sup> Weipeng Xu<sup>2</sup> Vladislav Golyanik<sup>2</sup> Marc Habermann<sup>2</sup> Lu Fang<sup>1</sup> Christian Theobalt<sup>2</sup>

<sup>1</sup>Tsinghua-Berkeley Shenzhen Institute, Tsinghua University, China

<sup>2</sup>Max Planck Institute for Informatics, Saarland Informatics Campus, Germany

<sup>3</sup>Robotics Institute, Hong Kong University of Science and Technology, Hong Kong

lxuan@connect.ust.hk {wxu,golyanik,mhaberma,theobalt}@mpi-inf.mpg.de  
fanglu@sz.tsinghua.edu.cn

|                | Duration (s) | Intensity frame rate (fps) | No. Polarity events | Reference frame rate (fps) | No. Reference images |
|----------------|--------------|----------------------------|---------------------|----------------------------|----------------------|
| <i>wave</i>    | 14.20        | 12                         | 3,187,382           | 100                        | 1420                 |
| <i>ninja</i>   | 5.84         | 7                          | 4,267,810           | 250                        | 1460                 |
| <i>javelin</i> | 1.78         | 20                         | 819,647             | 500                        | 890                  |
| <i>boxing</i>  | 2.60         | 25                         | 570,345             | 500                        | 1300                 |
| <i>karate</i>  | 2.00         | 25                         | 589,437             | 1000                       | 2000                 |
| <i>dancing</i> | 1.72         | 25                         | 684,200             | 1000                       | 1720                 |
| <i>shake</i>   | 8.10         | 15                         | 1,720,861           | No                         | No                   |
| <i>run_1</i>   | 3.60         | 15                         | 1,258,166           | No                         | No                   |
| <i>punch</i>   | 6.40         | 15                         | 685,477             | No                         | No                   |
| <i>throw</i>   | 5.20         | 15                         | 875,967             | No                         | No                   |
| <i>jump</i>    | 2.80         | 15                         | 1,145,612           | No                         | No                   |
| <i>run_2</i>   | 3.70         | 15                         | 1,375,098           | No                         | No                   |

Table 1: Statistics and basic metrics of the EventCap dataset.

## 1. Dataset Detail

Our EventCap dataset consists of 12 sequences of 6 actors performing challenging fast non-linear motions. The basic statistics related to both the event camera and the reference camera for each sequence are reported in Table 1.

For 6 sequences in our dataset, we provide high resolution reference images captured at high frame rate. The reference images of the “wave” sequence are captured using one camera from the multi-view markerless motion capture system [1] at 100 *fps*, which provides accurate 3D motions of the actors for quantitative evaluation. The reference images of the “ninja”, “javelin”, “boxing”, “karate” and “dancing” sequences are captured using a Sony RX0 camera at high frame rates ranging from 250 to 1000 *fps* with various lighting conditions for sufficient evaluation. Furthermore, the “ninja” sequence provides an extremely challenging case, which captures an actor in black ninja suite outdoor at night. Note that due to the inherent limitation of the on-chip memory, the Sony RX0 camera can only record about 4 seconds when the capturing frame rate is set to be 500 or 1000

*fps*. Nevertheless, even in such a short capture duration, our dataset successfully provides various challenging fast motions with reference view for qualitative analysis.

Moreover, our dataset provides 6 additional sequences with longer capture duration and various challenging motions, including “shake”, “run\_1”, “punch”, “throw”, “jump” and “run\_2”. For fair evaluation, the frame rates of the intensity image stream for all these 6 sequences are set to be the same (15 *fps*). In such setting, the longer exposure time of the intensity images intensifies the motion blur caused by fast non-linear motions of the actors, making our dataset more challenging.

## 2. More Results

**Qualitative Results.** Recall that in the Fig. 5 of the main manuscript, we provided the qualitative results of the 6 sequences with reference. Note that for each sequence, we evenly slice the time duration between two adjacent low frame rate intensity images to enable 1000 *fps* capture. For those sequences with reference views, we further interpolate the 1000 *fps* tracking motions into the reference frame rate, so as to provide qualitative evaluation according to the reference images. The qualitative results of the other sequences without reference are provided in Fig. 1, which demonstrate the effectiveness of our method to accurately capture the high frequency motion details, even though the intensity images from the event camera suffers from severe motion blur.

**Quantitative Results.** Here we provide more numerical details for the comparison between our EventCap and the baseline methods. Recall that *Mono\_all* and *HMR\_all* denote applying MonoPerfCap [3] and HMR [2] on all the reconstructed latent images, respectively. *Mono\_linear* and *HMR\_linear* denote applying the baselines only on the raw intensity images, followed by linearly upsampling operation. *Mono\_refer* and *HMR\_refer* denote applying the baselines to the high frame rate reference images directly. Note that for fair comparison, we downsample the reference im-

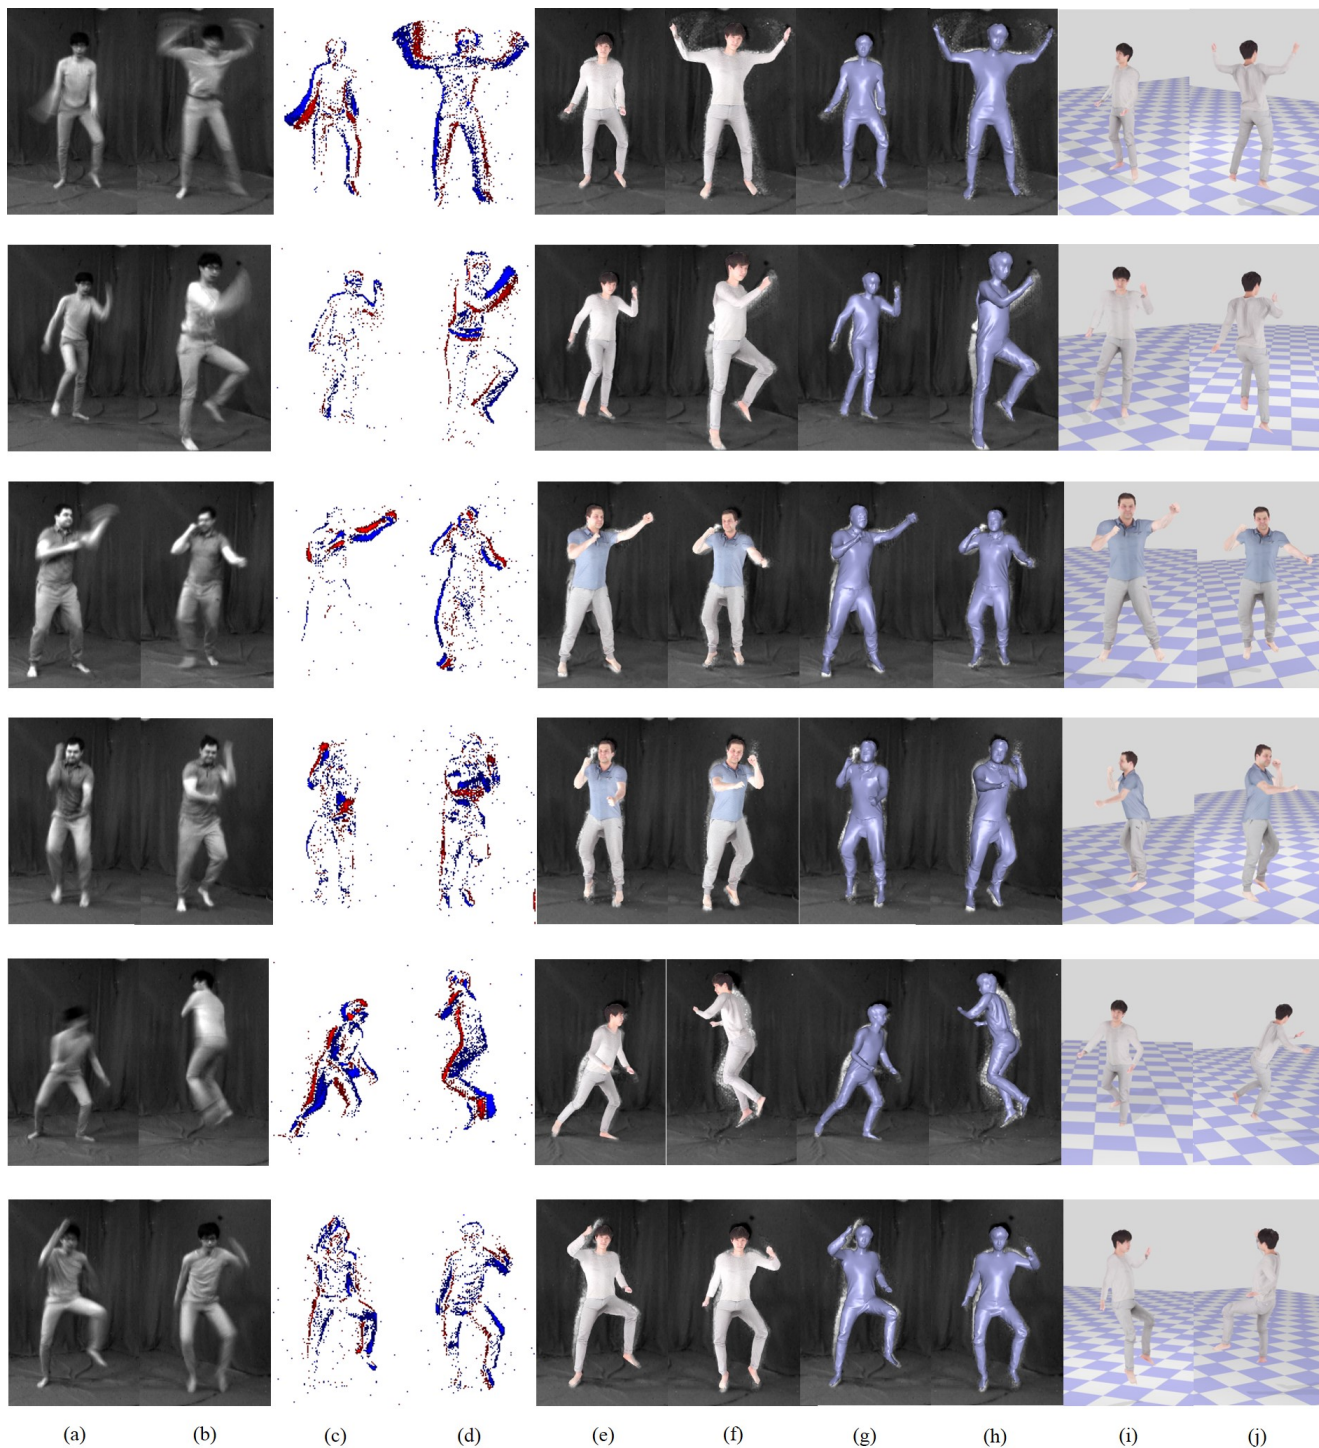

**Figure 1:** More qualitative results of EventCap on some sequences from our benchmark dataset. From top to down, the results correspond to the following sequences: "shake", "run\_1", "punch", "throw", "jump" and "run\_2". (a,b) The intensity images; (c,d) Polarity events accumulated between the time duration from the previous to the current tracking frames; (e,f) Textured motion capture results overlaid on the reconstructed latent images; (g,h) Geometric motion capture results overlaid on the reconstructed latent images; (i,j) Results rendered in 3D views.

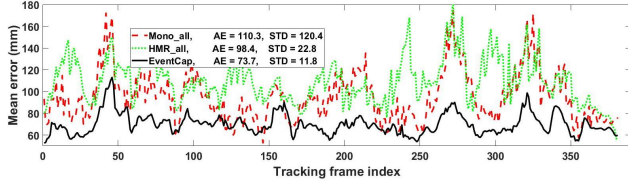

**Figure 2:** Comparison to *Mono\_all* and *HMR\_all* in terms of the average per-joint 3D error. Our method consistently achieves the lowest error.

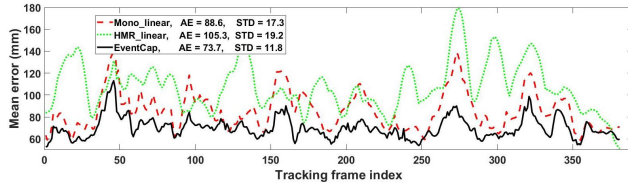

**Figure 3:** Comparison to *Mono\_linear* and *HMR\_linear* in terms of the average per-joint 3D error. Our method achieves the lowest error.

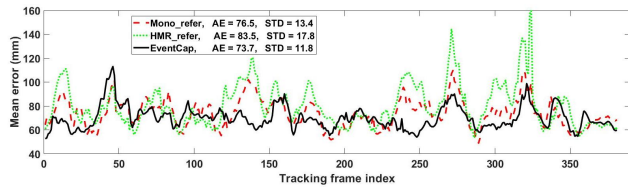

**Figure 4:** Comparison to *Mono\_refer* and *HMR\_refer* in terms of the average per-joint 3D error. Our method achieves the lowest error.

ages into the same resolution of the intensity images from event camera.

All the numerical curves in terms of average per-joint error (AE) compared to the baselines above are reports in Fig. 2, 3 and 4, respectively. When sharing the same input from the event camera, our method outperforms the other baselines and accurately captures the high frequency temporal motion details. In addition, our method achieves similar tracking accuracy compared to *Mono\_refer* and consistently outperforms *HMR\_refer*. Recall that our method relies upon only 3.4% of the data bandwidth of the reference image-based methods, and even achieves better tracking accuracy.

For further evaluation, we apply MonoPerfCap [3] and HMR [2] to the raw reference images (both high frame rate and high resolution), denoted as *Mono\_large* and *HMR\_large*, respectively. Not surprisingly, the AE of *Mono\_large* and *HMR\_large* reach 62.3 and 75.1, respectively. Even under such unfair comparison, our method achieves similar tracking accuracy compared to *HMR\_large*, with only 0.45% data bandwidth of *Mono\_large* and *HMR\_large*.

## References

[1] The Captury. <http://www.thecaptury.com/>. 1

[2] Angjoo Kanazawa, Michael J. Black, David W. Jacobs, and Jitendra Malik. End-to-end recovery of human shape and pose. In *Computer Vision and Pattern Recognition (CVPR)*, 2018. 1, 3

[3] Weipeng Xu, Avishek Chatterjee, Michael Zollhöfer, Helge Rhodin, Dushyant Mehta, Hans-Peter Seidel, and Christian Theobalt. Monoperfcap: Human performance capture from monocular video. *ACM Transactions on Graphics (TOG)*, 37(2):27:1–27:15, 2018. 1, 3
